# Supplementary material for: The Adenosine A2B Receptor Drives Osteoclast-Mediated Bone Resorption in Hypoxic Microenvironments
Source: MDPI journal article supplement (doi:10.3390/cells8060624), 2019-06-21
Supplement: s1 [file s1]

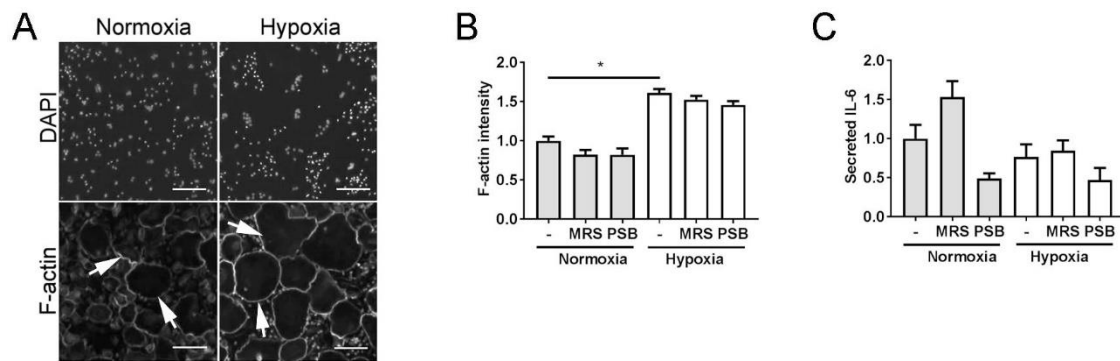

**Supplementary Figure 1.** The  $A_{2B}$  receptor does not modulate F-actin ring formation or IL-6 secretion in hypoxic osteoclasts. **(A)** Fluorescent images and **(B)** quantified fluorescence following F-actin ring staining (arrows) of mature human osteoclasts cultured for 24 h under hypoxia, with MRS1754 or PSB603 ( $n = 4$ ). Scale bars = 100  $\mu$ m. **(C)** IL-6 secretion quantified over the same period; \* $p < 0.05$ , ( $n = 6$ ).

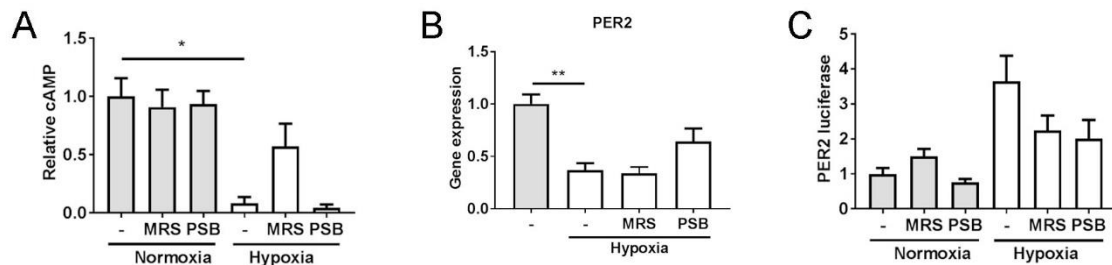

**Supplementary Figure 2.**  $A_{2B}$  receptor inhibitors do not affect cAMP levels or PER2 expression. Effect of hypoxia (2%  $O_2$ , 24 h) and MRS1754 or PSB603 on **(A)** intracellular cAMP concentration ( $n = 4$ ), **(B)** PER2 mRNA expression ( $n = 6$ ) and **(C)** PER2-luciferase activity in mature human osteoclasts ( $n = 6$ ). \* $p < 0.05$ , \*\* $p < 0.01$ .
